# Supplementary material for: Clustering co-abundant genes identifies components of the gut microbiome that are reproducibly associated with colorectal cancer and inflammatory bowel disease
Source: PubMed Central journal article supplement (PMC6670193; doi:10.1186/s40168-019-0722-6), 2019-08-01

CRC-dataset generated CAGs

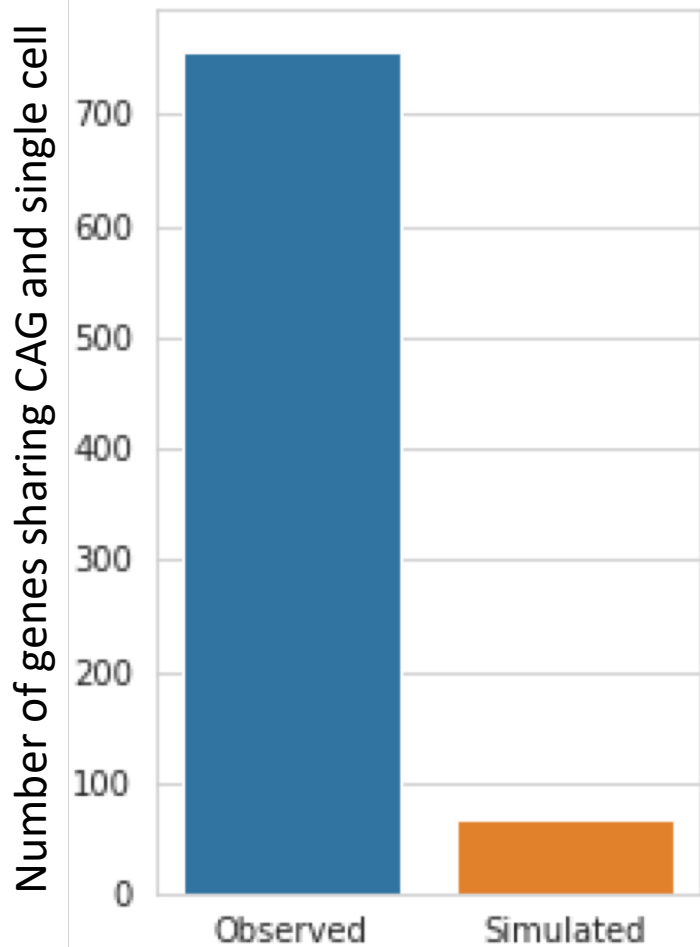

IBD-dataset generated CAGs

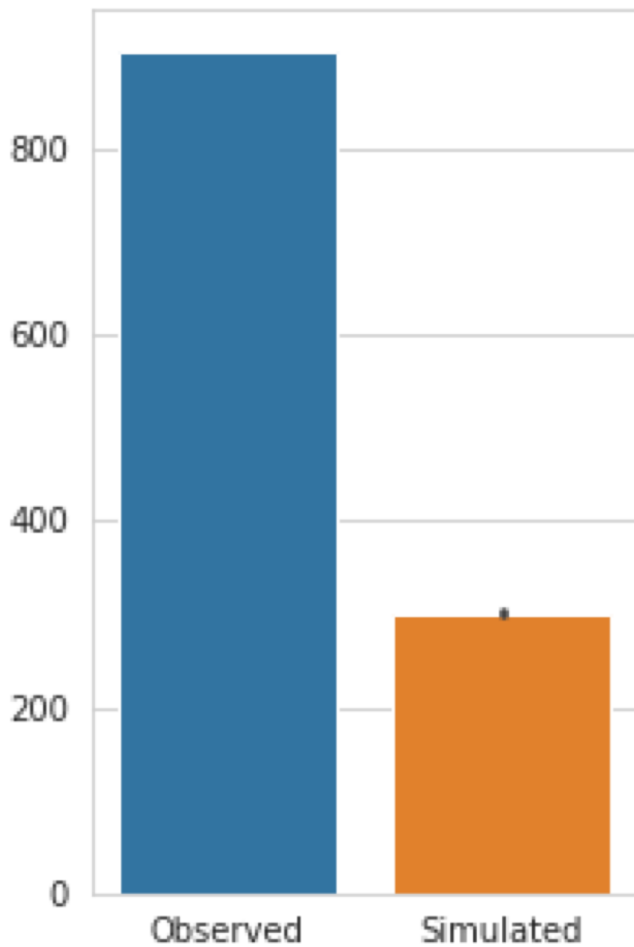

Supplement: 40168_2019_722_MOESM2_ESM.pdf [file 40168_2019_722_MOESM2_ESM.pdf]
